# Supplementary material for: Semantic Interoperability of Electronic Health Records: Systematic Review of Alternative Approaches for Enhancing Patient Information Availability
Source: PubMed Central journal article supplement (PMC11066539; doi:10.2196/53535), 2024-04-25
Supplement: medinform-v12-e53535-s003.pdf [file medinform-v12-e53535-s003.pdf]

## PRISMA-S Checklist

| Section/topic                          | # | Checklist item                                                                                                                                                                                                                                                     | Location(s) Reported                                                                                                                         |
|----------------------------------------|---|--------------------------------------------------------------------------------------------------------------------------------------------------------------------------------------------------------------------------------------------------------------------|----------------------------------------------------------------------------------------------------------------------------------------------|
| <b>INFORMATION SOURCES AND METHODS</b> |   |                                                                                                                                                                                                                                                                    |                                                                                                                                              |
| Database name                          | 1 | Name each individual database searched, stating the platform for each.                                                                                                                                                                                             | PubMed                                                                                                                                       |
| Multi-database searching               | 2 | If databases were searched simultaneously on a single platform, state the name of the platform, listing all of the databases searched.                                                                                                                             | n/a                                                                                                                                          |
| Study registries                       | 3 | List any study registries searched.                                                                                                                                                                                                                                | n/a                                                                                                                                          |
| Online resources and browsing          | 4 | Describe any online or print source purposefully searched or browsed (e.g., tables of contents, print conference proceedings, web sites), and how this was done.                                                                                                   | n/a                                                                                                                                          |
| Citation searching                     | 5 | Indicate whether cited references or citing references were examined, and describe any methods used for locating cited/citing references (e.g., browsing reference lists, using a citation index, setting up email alerts for references citing included studies). | PubMed, Scopus                                                                                                                               |
| Contacts                               | 6 | Indicate whether additional studies or data were sought by contacting authors, experts, manufacturers, or others.                                                                                                                                                  | n/a                                                                                                                                          |
| Other methods                          | 7 | Describe any additional information sources or search methods used.                                                                                                                                                                                                | EU ECDC library services                                                                                                                     |
| <b>SEARCH STRATEGIES</b>               |   |                                                                                                                                                                                                                                                                    |                                                                                                                                              |
| Full search strategies                 | 8 | Include the search strategies for each database and information source, copied and pasted exactly as run.                                                                                                                                                          | Search terms:<br>((((EHR) OR (EMR)) OR ("Electronic Health Record")) OR ("Electronic Medical Record")) AND (((("Semantic interoperability")) |

|                         |    |                                                                                                                                                                                           |                                                                                                                                                                                                                                                                                      |
|-------------------------|----|-------------------------------------------------------------------------------------------------------------------------------------------------------------------------------------------|--------------------------------------------------------------------------------------------------------------------------------------------------------------------------------------------------------------------------------------------------------------------------------------|
|                         |    |                                                                                                                                                                                           | OR ("data model") AND ("Semantic interoperability")<br>OR<br>(((("classification OR (ontology)) OR (terminology)) AND ("Semantic interoperability")) OR ((("data content") OR ("data format")) AND ("Semantic interoperability")) OR ("Semantic interoperability") AND (standard)))) |
| Limits and restrictions | 9  | Specify that no limits were used, or describe any limits or restrictions applied to a search (e.g., date or time period, language, study design) and provide justification for their use. | no additional limits                                                                                                                                                                                                                                                                 |
| Search filters          | 10 | Indicate whether published search filters were used (as originally designed or modified), and if so, cite the filter(s) used.                                                             | Filters used:<br>Abstract, Full text<br>English                                                                                                                                                                                                                                      |
| Prior work              | 11 | Indicate when search strategies from other literature reviews were adapted or reused for a substantive part or all of the search, citing the previous review(s).                          | n/a                                                                                                                                                                                                                                                                                  |
| Updates                 | 12 | Report the methods used to update the search(es) (e.g., rerunning searches, email alerts).                                                                                                | n/a                                                                                                                                                                                                                                                                                  |
| Dates of searches       | 13 | For each search strategy, provide the date when the last search occurred.                                                                                                                 | 28.12.2022                                                                                                                                                                                                                                                                           |
| <b>PEER REVIEW</b>      |    |                                                                                                                                                                                           |                                                                                                                                                                                                                                                                                      |
| Peer review             | 14 | Describe any search peer review process.                                                                                                                                                  | n/a                                                                                                                                                                                                                                                                                  |
| <b>MANAGING RECORDS</b> |    |                                                                                                                                                                                           |                                                                                                                                                                                                                                                                                      |

|               |    |                                                                                                                                    |     |
|---------------|----|------------------------------------------------------------------------------------------------------------------------------------|-----|
| Total Records | 15 | Document the total number of records identified from each database and other information sources.                                  | 131 |
| Deduplication | 16 | Describe the processes and any software used to deduplicate records from multiple database searches and other information sources. | n/a |

PRISMA-S: An Extension to the PRISMA Statement for Reporting Literature Searches in Systematic Reviews  
Rethlefsen ML, Kirtley S, Waffenschmidt S, Ayala AP, Moher D, Page MJ, Koffel JB, PRISMA-S Group.  
Last updated February 27, 2020.
